# Supplementary material for: Au nanoparticle decorated graphene oxide as a novel coating for solid-phase microextraction
Source: Royal Society of Chemistry journal article supplement (doi:10.1039/c4ra16740f), 2015-01-01
Supplement: c4ra16740f1.pdf [file c4ra16740f1.pdf]

## Supporting information

### **Au nanoparticles decorated graphene oxide as a novel coating for solid-phase microextraction**

Lili Xu<sup>1,2</sup>, Hongbo Suo<sup>2</sup>, Xiaojing Liang<sup>1</sup>, Licheng Wang<sup>1\*</sup>, Yong guo<sup>1\*</sup>, Shengxiang  
Jiang<sup>1</sup>

<sup>1</sup>Key Laboratory of Chemistry of Northwestern Plant Resources and Key Laboratory  
for Natural Medicine of Gansu Province, Lanzhou Institute of Chemical Physics,  
Chinese Academy of Sciences, Lanzhou 730000, China

<sup>2</sup>College of Chemistry and Chemical Engineering, Qujing Normal University, Qujing  
655011, China

### **Optimization of desorption conditions**

To reach the highest sensitivity, desorption conditions including temperature and time were evaluated to ensure the analytes were completely desorbed from SPME fiber. Firstly, desorption temperature was evaluated at 260, 280, 300 and 320 °C for 5 min. As shown in Fig. 1, the result indicated that 300 °C was sufficient for the complete desorption. Then, desorption time profiles ranging from 2 to 6 min were evaluated. As shown in Fig. 2, the result showed that desorption at 300 °C for 5 min was the optimum desorption conditions.

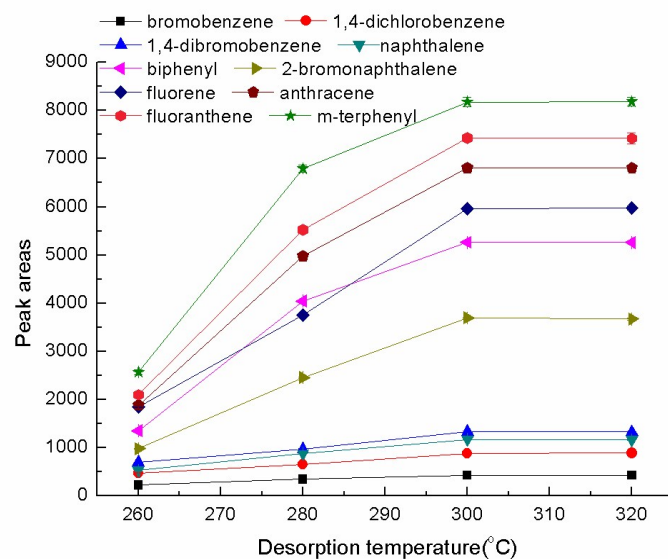

Fig. 1 Effect of desorption temperature on peak area of analytes. Conditions: extraction time, 40 min; extraction temperature, 40 °C; salt concentration, 30% NaCl; stirring rate, 800 rpm; desorption time, 5 min; aromatic HOCs concentration, 200  $\mu\text{g L}^{-1}$ .

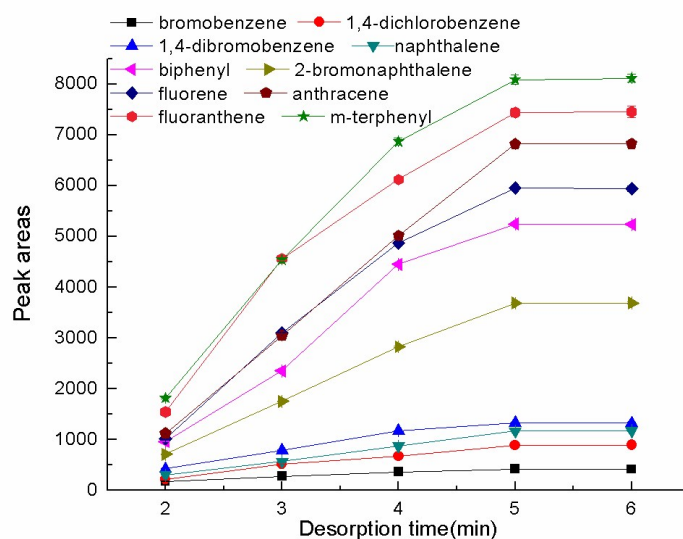

Fig. 2 Effect of desorption time on peak area of analytes. Conditions: extraction time, 40 min; extraction temperature, 40 °C; salt concentration, 30% NaCl; stirring rate, 800 rpm; desorption temperature, 300 °C; aromatic HOCs concentration, 200  $\mu\text{g L}^{-1}$ .
